# Supplementary material
Source: Springer Nature journal article supplement (https://www.springermedizin.de/resource/supplementary/12882_2013_768_MOESM1_ESM.pdf/9454664)
Supplement: MOESM1 [file 9454664]

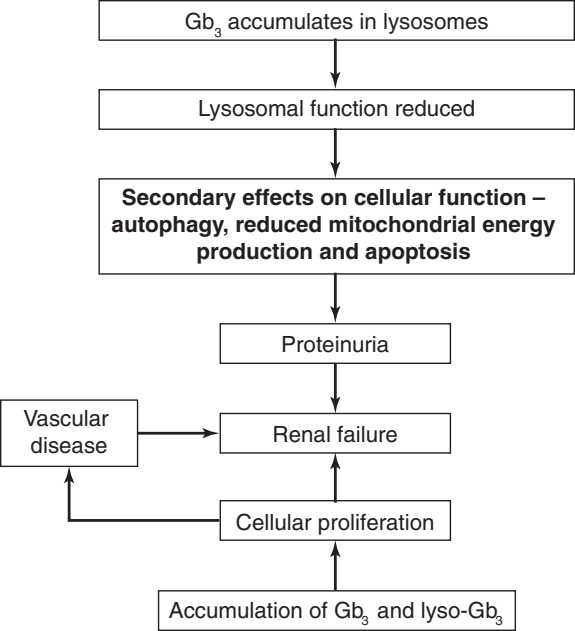

Gb<sub>3</sub> accumulates in lysosomes

Lysosomal function reduced

**Secondary effects on cellular function –  
autophagy, reduced mitochondrial energy  
production and apoptosis**

Proteinuria

Vascular  
disease

Renal failure

Cellular proliferation

Accumulation of Gb<sub>3</sub> and lyso-Gb<sub>3</sub>
